# Supplementary material for: Cribriform plate microenvironment assembles a suppressive myeloid network during EAE-induced neuroinflammation
Source: eLife. 2026 Jul 8;15:RP110460. doi: 10.7554/eLife.110460 (PMC13345627; doi:10.7554/eLife.110460)
Supplement: Figure 1—source data 1. [file elife-110460-fig1-data1.xlsx]

## Sheet: Figure 1
Figure 1 C
MHCII in PDPN area (cells/mm^2)
Healthy	EAE
837.104	5141.41
1059.64	6570.46
615.306	5924.93
2128.11
Figure 1 E
Perineural Thickness of PDPN (um)
Healthy	EAE
3.50693	9.34775
3.51887	8.0842
4.63453	14.6687
	8.6992
	7.7662
