# Supplementary material for: Cribriform plate microenvironment assembles a suppressive myeloid network during EAE-induced neuroinflammation
Source: eLife. 2026 Jul 8;15:RP110460. doi: 10.7554/eLife.110460 (PMC13345627; doi:10.7554/eLife.110460)
Supplement: Figure 2—source data 1. [file elife-110460-fig2-data1.xlsx]

## Sheet: Figure 2 
	YM1 Postive cells in CP region (PDPN)
	CONTRL	EAE
Mouse 1	15	85
Mouse 2	3	82
Mouse 3	20	34
	Arg1% in PDPN Regions
	Control	EAE
Mouse 1	20.4696	55.7011
Mouse 2	9.51496	13.6543
Mouse 3	8.61461	27.2978
Mouse 4	10.3219	39.2981
Mouse 5	6.01318	37.3173
Mouse 6	15.9237	13.1966
Mouse 7		19.1396
Mouse 8		24.0713
Mouse 9		48.1501
