# Supplementary material for: Cribriform plate microenvironment assembles a suppressive myeloid network during EAE-induced neuroinflammation
Source: eLife. 2026 Jul 8;15:RP110460. doi: 10.7554/eLife.110460 (PMC13345627; doi:10.7554/eLife.110460)
Supplement: Figure 3—source data 1. [file elife-110460-fig3-data1.xlsx]

## Sheet: Figure 3
Cell proportions
	0	1	2	3	4	5	6	7	8	9	10	11	12	Sum
Non-interactors	0.329782	0.118721	0.125317	0.0781329	0.103501	0.0750888	0.0573313	0.0476915	0.00558092	0.0319635	0.0192795	0.00659564	0.00101471	1
Interactors	0.186025	0.247108	0.175844	0.0888478	0.0416474	0.0499769	0.0393336	0.0430356	0.071726	0.0291532	0.00462749	0.0152707	0.00740398	1
