# Supplementary material for: Cribriform plate microenvironment assembles a suppressive myeloid network during EAE-induced neuroinflammation
Source: eLife. 2026 Jul 8;15:RP110460. doi: 10.7554/eLife.110460 (PMC13345627; doi:10.7554/eLife.110460)
Supplement: Figure 4—figure supplement 2—source data 1. [file elife-110460-fig4-figsupp2-data1.xlsx]

## Sheet: 1
	CCR2+ cell in PDPN regions
Mouse	Healthy	EAE
1	22	226
2	53	167
3	63	151
	%CCR2 cell in PDPN regions
Mouse	Healthy	EAE
1	18.1818	70.7965
2	11.3208	57.485
3	9.52381	86.755
