# Supplementary material for: Cribriform plate microenvironment assembles a suppressive myeloid network during EAE-induced neuroinflammation
Source: eLife. 2026 Jul 8;15:RP110460. doi: 10.7554/eLife.110460 (PMC13345627; doi:10.7554/eLife.110460)
Supplement: Figure 5—figure supplement 1—source data 1. [file elife-110460-fig5-figsupp1-data1.xlsx]

## Sheet: Tab 1
PD1+Hi Singlet DCs			PD1+Hi Singlet T-cells			PD1+Hi Doublet T-cells			PD1+Hi Doublet DCs			PD1+ Singlet vs Doublet DCs
No EAE	EAE		No EAE	EAE		No EAE	EAE		No EAE	EAE		Unbound	Bound
5	37		97	807		6	47		97	807		3.36	24.2
1	34		65	627		3	46		65	627		3.78	31
1	103		82	995		10	91		82	995		2.77	32.3
3			195			13			195
Doublets / (Ghost+)
PD1-	PD1+
12.8	64.6
26.3	78.8
19.6	77.1
