# Supplementary material for: Cribriform plate microenvironment assembles a suppressive myeloid network during EAE-induced neuroinflammation
Source: eLife. 2026 Jul 8;15:RP110460. doi: 10.7554/eLife.110460 (PMC13345627; doi:10.7554/eLife.110460)
Supplement: Figure 5—source data 1. [file elife-110460-fig5-data1.xlsx]

## Sheet: Figure 5 
	PD1+Hi Singlet DCs				PD1+Hi Doublet DCs
Mouse	No EAE	EAE		Mouse	No EAE	EAE
1	5	37		1	97	807
2	1	34		2	65	627
3	1	103		3	82	995
4	3			4	195
