# Supplementary material for: Cribriform plate microenvironment assembles a suppressive myeloid network during EAE-induced neuroinflammation
Source: eLife. 2026 Jul 8;15:RP110460. doi: 10.7554/eLife.110460 (PMC13345627; doi:10.7554/eLife.110460)
Supplement: Figure 6—source data 1. [file elife-110460-fig6-data1.xlsx]

## Sheet: Figure 6
	%CD45-IV+ PDPN+CD31+ Doublets
6	3.8	6.12	4.33	3.49	6.91	7.13
9	8.02	2.73
12	8.86	7.1	7.33	7.89	4.27	4.61
18	7.41	5.48	11.2
24	20.4	9.36	11.4
48	18.2	15.3	25.6
	%CD45-IV+ PDPN+CD31+ Doublets (Ghost+)
6	8.33	6.45	7.29	16.7	26	13
9	6.38	20.7
12	16.6	28.6	26.2	7	5	12.5
18	18.8	54.9	23.8
24	9.7	68	32.1
48	29.7	22	32.6
	Doublets / (Ghost+)
	PD1-	PD1+
1	12.8	64.6
2	26.3	78.8
3	19.6	77.1
